# Supplementary material
Source: MDPI journal article supplement (https://www.mdpi.com/2073-445X/13/4/492)
Supplement: s1 [file s1]

## Supplementary Material

**Table S1.** Coefficients regression established by each forest species.

| Species name                          | Assimilated species                   | a <sub>0</sub> | a <sub>1</sub> | a <sub>2</sub> | a <sub>3</sub> | a <sub>4</sub> |
|---------------------------------------|---------------------------------------|----------------|----------------|----------------|----------------|----------------|
| <i>Acer tataricum</i> L.              | <i>Acer tataricum</i> L.              | -3.45646       | 1.94746        | 0.01879        | -0.1642        | 0.342355       |
| <i>Acer campestre</i> L.              | <i>Acer campestre</i> L.              | -3.22096       | 1.58409        | 0.13567        | -0.08677       | 0.313054       |
| <i>Carpinus betulus</i> L.            | <i>Carpinus betulus</i> L.            | -4.23139       | 2.15204        | -0.00988       | 0.59652        | 0.11281        |
| <i>Fraxinus ornus</i> L.              | <i>Fraxinus excelsior</i> L.          | -3.53048       | 1.26636        | 0.31105        | 0.52368        | 0.082743       |
| <i>Fraxinus excelsior</i> L.          | <i>Fraxinus excelsior</i> L.          | -3.53048       | 1.26636        | 0.31105        | 0.52368        | 0.082743       |
| <i>Prunus avium</i> L.                | <i>Prunus avium</i> L.                | -3.59371       | 1.95047        | 0.04086        | -0.12835       | 0.374948       |
| <i>Prunus cerasifera</i> Ehrh.        | <i>Pyrus pyraister</i> (L.) Burgsd.   | -3.96965       | 2.11784        | -0.03021       | 0.32199        | 0.127335       |
| <i>Prunus domestica</i> L.            | <i>Pyrus pyraister</i> (L.) Burgsd.   | -3.96965       | 2.11784        | -0.03021       | 0.32199        | 0.127335       |
| <i>Prunus padus</i> L.                | <i>Prunus padus</i> L.                | -3.96202       | 1.98138        | 0.02542        | 0.43872        | 0.130176       |
| <i>Pyrus pyraister</i> (L.) Burgsd.   | <i>Pyrus pyraister</i> (L.) Burgsd.   | -3.96965       | 2.11784        | -0.03021       | 0.32199        | 0.127335       |
| <i>Quercus cerris</i> L.              | <i>Quercus petraea</i> (Matt.) Liebl. | -4.17315       | 2.27662        | -0.09084       | 0.57596        | 0.093429       |
| <i>Quercus petraea</i> (Matt.) Liebl. | <i>Quercus petraea</i> (Matt.) Liebl. | -4.17315       | 2.27662        | -0.09084       | 0.57596        | 0.093429       |
| <i>Robinia pseudoacacia</i> L.        | <i>Robinia pseudoacacia</i> L.        | -3.37551       | 1.80802        | 0.02827        | -0.33554       | 0.51215        |
| <i>Ulmus glabra</i> Huds.             | <i>Ulmus</i> sp.                      | -4.49118       | 2.18244        | -0.10324       | 1.20293        | -0.124978      |
| <i>Ulmus minor</i> Mill.              | <i>Ulmus</i> sp.                      | -4.49118       | 2.18244        | -0.10324       | 1.20293        | -0.124978      |

**Table S2.** Variables and correction factor established to estimate dry biomass for seedlings.

| Variable            | ln(a)  | b      | cf     |
|---------------------|--------|--------|--------|
| Aboveground biomass | 4.1234 | 2.4783 | 1.1976 |
| Belowground biomass | 3.7327 | 1.8965 | 1.1955 |

a and b are the regression equation coefficients while cf is the correction factor.

**Table S3.** The mean value for each pool of carbon stocks (tonnes C ha<sup>-1</sup>).

| Carbon pools |                              | No-SI | Low-SI | High-SI |
|--------------|------------------------------|-------|--------|---------|
| Biomass      | Aboveground biomass, d > 6cm | 33.0  | 205.3  | 54.4    |
|              | Belowground biomass, d > 6cm | 6.8   | 45.2   | 11.9    |
|              | Aboveground biomass, d < 6cm | 1.0   | -      | -       |
|              | Belowground biomass, d < 6cm | 0.4   | -      | -       |
| Dead wood    |                              | 1.4   | 2.2    | -       |
| Litter       |                              | 7.4   | 16.4   | 15.6    |
| Soil         |                              | 84.0  | 109.1  | 78.6    |
| Total        |                              | 134.0 | 378.2  | 160.5   |

d is the diameter at breast height, No-SI represent the non-silvicultural intervention site, Low-SI represent the low silvicultural intervention site and High-SI represent the high silvicultural intervention site.

**Table S4.** Pairwise post-hoc test on sites for each carbon pools, using Wilcoxon signed-rank test with Bonferroni correction.

| Measures           | CS_litter | CS_soil | CS_AGB  | CS_DW   | CSC_AGB |
|--------------------|-----------|---------|---------|---------|---------|
| Low-SI vs. No-SI   | 0.33      | 0.50    | <0.01** | 0.0863  | <0.01** |
| High-SI vs.No-SI   | 0.33      | 0.67    | 1.00    | <0.01** | <0.01** |
| High-SI vs. Low-SI | 0.33      | 0.17    | <0.05*  | 0.4237  | <0.05*  |

\*  $p < 0.05$ , \*\*  $p < 0.01$ , \*\*\*  $p < 0.001$

No-SI represent the non-silvicultural intervention site, Low-SI represent the low silvicultural intervention site and High-SI represent the high silvicultural intervention site. CS\_litter, CS\_soil, CS\_AGB\_CS\_DW and CSC\_AGB represents carbon stock in each pool. Statistically significant values for each level of significance (i.e., \*  $p < 0.05$ , \*\*  $p < 0.01$ , \*\*\*  $p < 0.001$ ) are represented in bold. Asterisks indicate significant results.

**Table S5.** The mean value of annual living biomass by trees volume, carbon stock and carbon dioxide amount.

| Annual                                                    | Biomass       | No-SI | Low-SI | High-SI |
|-----------------------------------------------------------|---------------|-------|--------|---------|
| Volume (m <sup>3</sup> ha <sup>-1</sup> )                 | AGB           | 10.4  | 6.3    | 2.2     |
|                                                           | BGB           | 2.1   | 1.4    | 0.5     |
|                                                           | AGB, d < 6 cm | 1.0   | -      | -       |
|                                                           | BGB, d < 6cm  | 0.4   | -      | -       |
| Carbon (tonnes ha <sup>-1</sup> )                         | AGB           | 2.9   | 1.8    | 0.6     |
|                                                           | BGB           | 0.6   | 0.4    | 0.1     |
|                                                           | AGB, d < 6 cm | 0.6   | -      | -       |
|                                                           | BGB, d < 6cm  | 0.2   | -      | -       |
| Carbon Dioxide (tonnes CO <sub>2</sub> ha <sup>-1</sup> ) | AGB           | -10.8 | -6.8   | -2.3    |
|                                                           | BGB           | -2.2  | -1.5   | -0.5    |
|                                                           | AGB, d < 6 cm | -2.0  | -      | -       |
|                                                           | BGB, d < 6cm  | -0.8  | -      | -       |

AGB represent the above ground biomass, BGB represent the below ground biomass, d is the diameter at breast height, No-SI represent the non-silvicultural intervention site, Low-SI represent the low silvicultural intervention site and High-SI represent the high silvicultural intervention site.
